# Supplementary material
Source: ML conference proceedings conference paper supplement (https://proceedings.neurips.cc/paper_files/paper/2019/hash/4bbbe6cb5982b9110413c40f3cce680b-Abstract.html)
Supplement: Supplementary file [file 4bbbe6cb5982b9110413c40f3cce680b-Supplemental.zip]

---

# Appendix to "Large-scale optimal transport map estimation using projection pursuit"

---

Anonymous Author(s)

Affiliation

Address

email

## 1 A Appendix

2 This appendix provides the proofs of the theoretical results for the main document.

### 3 A.1 Proof of Theorem 1

4 First, we presents some Lemmas to facilitate the proof of Theorem 1.

5 Let  $(\tilde{Z}, \tilde{R})$  be an independent copy of  $(Z, R)$ . We denote

$$A(R, \tilde{R}) = E \left[ (Z - \tilde{Z})(Z - \tilde{Z})^\top | R, \tilde{R} \right]. \quad (1)$$

Let  $P$  be the projection onto the central space  $\mathcal{S}_{R|Z}$  with respect to the inner product  $a \cdot b = a^\top b$ , and let  $Q = I_d - P$ . Further, define two quantities

$$C = 2I_d - A(R, \tilde{R}) \quad \text{and} \quad G = E(C)^2.$$

6 **Lemma 1.** Denote  $\text{span}(G)$  the column space of matrix  $G$ , then  $\mathcal{S}_{\text{SAVE}} = \text{span}(G)$ .

7 *Proof of Lemma 1.* Follow the Theorem 2 in [4] and notice  $E(ZZ^\top) = I_d$ , the matrix  $G$  can be  
8 re-expressed as

$$\begin{aligned} G = & 2E \left[ E^2(ZZ^\top - I_d | R) \right] + 2E^2 \left[ E(Z|R)E(Z^\top|R) \right] \\ & + 2E \left[ E(Z^\top|R)E(Z|R) \right] E \left[ E(Z|R)E(Z^\top|R) \right]. \end{aligned}$$

9 First, let  $v$  be a vector orthogonal to  $\mathcal{S}_{\text{SAVE}}$ . We have  $E(Z^\top|R)v = 0$  and  $[I_d - \text{var}(Z|R)]v = 0$   
10 almost surely. Therefore,  $G_i v = 0$  for  $i = 1, \dots, 6$ . This implies that  $v$  is orthogonal to  $\text{span}(G)$ ,  
11 and hence  $\text{span}(G) \subseteq \mathcal{S}_{\text{SAVE}}$ .

12 On the other hand, let  $v$  be a vector orthogonal to  $\text{span}(G)$ . Then,  $v^\top G v = 0$  implies

$$v^\top E \left[ E^2(ZZ^\top - I_d | R) \right] v = 0 \quad (2)$$

13 and

$$v^\top E \left[ E(Z^\top|R)E(Z|R) \right] E \left[ E(Z|R)E(Z^\top|R) \right] v = 0, \quad (3)$$

14 almost surely.

15 The second equality implies that  $E(Z^\top|R) = 0$  almost surely. Furthermore, Using the fact that  
16  $E(ZZ^\top) = I_d$  and  $E(ZZ^\top|R) = \text{var}(Z|R) + E(Z|R)E(Z^\top|R)$ , the first inequality can be re-  
17 expressed as

$$\begin{aligned} 0 = & v^\top E \left[ \text{var}(Z|R) - I_d \right]^2 v \\ & + v^\top E \left[ (\text{var}(Z|R) - I_p) E(Z|R)E(Z^\top|R) \right] v \\ & + v^\top E \left[ E(Z|R)E(Z^\top|R)(\text{var}(Z|R) - I_d) \right] v \\ & + v^\top E \left[ E(Z|R)E(Z^\top|R) \right]^2 v. \end{aligned}$$

18 The second to fourth terms are 0 since  $E(Z^\top|R) = 0$ . Thus the first term must also be 0, almost  
 19 surely, implying that  $v \perp \mathcal{S}_{\text{SAVE}}$ . We complete the proof by showing that  $\mathcal{S}_{\text{SAVE}} \subseteq \text{span}(G)$ .

20 □

21 **Lemma 2.** Suppose the Assumption 1 (a) and (b) hold. Denote  $\text{span}(G)$  the column space of matrix  
 22  $G$ , then  $\mathcal{S}_{\text{SAVE}} = \text{span}(G)$ .

23 *Proof of Lemma 2.* By Lemma 2.1 of [5] and Proposition 4.6 of [1],  $(Z, R) \perp (\tilde{Z}, \tilde{R})$  implies that  
 24  $Z \perp \tilde{Z}(R, \tilde{R})$ ,  $Z \perp \tilde{R}|R$  and  $\tilde{Z} \perp \tilde{R}|\tilde{R}$ . Thus  $A(R, \tilde{R})$  can be re-expressed as

$$\begin{aligned} A(R, \tilde{R}) = & E(ZZ^\top|R) - E(Z|R)E(\tilde{Z}^\top|\tilde{R}) \\ & - E(\tilde{Z}|\tilde{R})E(Z^\top|R) + E(\tilde{Z}\tilde{Z}^\top|\tilde{R}) \end{aligned} \quad (4)$$

25 Let  $v$  be a vector orthogonal to  $\mathcal{S}_{R|W}$ . By assumption (a),  $E(v^\top Z|PZ) = \alpha^\top PZ$  for some  $\alpha \in \mathbb{R}^d$ .  
 26 Multiply both sides by  $ZP\alpha$  and then take unconditional expectation to obtain  $v^\top P\alpha = \alpha^\top P\alpha = 0$ .  
 27 Thus  $E(v^\top Z|PZ) = 0$ .

28 By Assumption 1 (a) and (b),  $E[(v^\top Z)^2|PZ] = c + E^2(v^\top Z|PZ) = c$ , for some constant  $c$ . Take  
 29 unconditional expectations on both sides to obtain  $c = v^\top v$ . Thus  $E[(v^\top Z)^2|PZ] = v^\top v$ .

30 Because  $R \perp Z|PZ$ , we have

$$\begin{aligned} E(v^\top Z|R) &= E[E(v^\top Z|PZ|R)] = 0, \\ E[(v^\top Z)^2|R] &= E\{E[(v^\top Z)^2|PZ]|R\} = v^\top v. \end{aligned}$$

31 Substitute the above two lines into 4, we have

$$v^\top A(R, \tilde{R})v = 2v^\top v,$$

32 which implies  $v^\top Gv = 0$ . Then, we have  $\text{span}(G) \subseteq \mathcal{S}_{R|W}$ .

33 □

34 **Lemma 3.** Let  $G$  be a symmetric and positive semi-definite matrix which satisfies  $\text{span}(G) \subseteq \mathcal{S}_{R|W}$ .  
 35 Then,  $\text{span}(G) = \mathcal{S}_{R|W}$  iff  $v^\top Gv > 0$  for all  $v \in \mathcal{S}_{R|W}$ ,  $v \neq 0$ .

36 *Proof of Lemma 3.* Suppose that  $\text{span}(G)$  is a strict subspace of  $\mathcal{S}_{R|W}$ . Then  $v^\top Gv = 0$  for any  
 37  $v \neq 0$ ,  $v \in \mathcal{S}_{R|W} \ominus \text{span}(G)$ . Conversely, for  $\text{span}(G) = \mathcal{S}_{R|W}$ ,  $v \in \mathcal{S}_{R|W}$ ,  $v \neq 0$ , we have  
 38  $v \in \text{span}(G)$ , and hence  $v^\top Gv > 0$ . □

39 **Proof of Theorem 1.** We first show that  $\text{span}(G) = \mathcal{S}_{R|W}$ .  $G$  is symmetric and positive semi-  
 40 definite according to its definition. Also, Lemma 2 shows  $\text{span}(G) \subseteq \mathcal{S}_{R|W}$  under Assumption 1 (a)  
 41 and (b).

42 Let  $v \in \mathcal{S}_{R|W}$ ,  $v \neq 0$ . Without loss of generality, we assume  $\|v\| = 1$ . Then

$$v^\top Gv = v^\top E[C(I_d - vv^\top)C]v + E[(v^\top Cv)^2]. \quad (5)$$

43 Because  $I_d - vv^\top \geq 0$ , the first term on the right hand side of (5) is nonnegative. By Assumption 1  
 44 (c),  $v^\top A(R, \tilde{R})v$  is non-degenerate. Therefore,  $v^\top Cv$  is non-degenerate. Then, by Jensen's inequality  
 45 and notice  $E(C) = 0$ ,

$$E[(v^\top Cv)^2] > [E(v^\top Cv)]^2 = 0. \quad (6)$$

46 Then, by Lemma 1 and Lemma 3, we complete the proof by showing  $\mathcal{S}_{\text{SAVE}} = \text{span}(G) = \mathcal{S}_{R|W}$ .

47 □

## 48 A.2 Proof of Theorem 2

49 **Proof of Theorem 2.** Suppose Assumption 2 holds. By applying Theorem 3 and Proposition 3 in  
50 [2], we arrive at

$$\begin{aligned}\|\hat{\xi}_1 - \xi_1\|_\infty &\leq \max_{1 \leq l \leq r} \|\hat{\xi}_l - \xi_l\|_\infty \\ &\leq C_1 d^{-3/2} (r^4 \|\hat{\Sigma}_{\text{SAVE}} - \Sigma_{\text{SAVE}}\|_\infty + r^{3/2} \|\hat{\Sigma}_{\text{SAVE}} - \Sigma_{\text{SAVE}}\|_2) \\ &\leq C_2 r^4 d^{-1/2} \|\hat{\Sigma}_{\text{SAVE}} - \Sigma_{\text{SAVE}}\|_{\max},\end{aligned}\tag{7}$$

51 where  $C_1$  and  $C_2$  are some positive constants.

52 It can be shown that

$$\begin{aligned}\hat{\Sigma}_{\text{SAVE}} - \Sigma_{\text{SAVE}} &= \frac{1}{4} \left[ (\hat{\Sigma}_1 - I_d)^2 - (\Sigma_1 - I_d)^2 + (\hat{\Sigma}_2 - I_d)^2 - (\Sigma_2 - I_d)^2 \right] \\ &= \frac{1}{4} \left[ (\hat{\Sigma}_1 + \Sigma_1 - 2I_d)(\hat{\Sigma}_1 - \Sigma_1) + (\hat{\Sigma}_2 + \Sigma_2 - 2I_d)(\hat{\Sigma}_2 - \Sigma_2) \right]\end{aligned}$$

53 Then,

$$\begin{aligned}\|\hat{\Sigma}_{\text{SAVE}} - \Sigma_{\text{SAVE}}\|_{\max} &\leq \frac{1}{4} \left[ \|(\hat{\Sigma}_1 + \Sigma_1 - 2I_d)(\hat{\Sigma}_1 - \Sigma_1)\|_{\max} + \|(\hat{\Sigma}_2 + \Sigma_2 - 2I_d)(\hat{\Sigma}_2 - \Sigma_2)\|_{\max} \right] \\ &\leq \frac{1}{4} \left[ \|\hat{\Sigma}_1 + \Sigma_1 - 2I_d\|_2 \|\hat{\Sigma}_1 - \Sigma_1\|_{\max} + \|\hat{\Sigma}_2 + \Sigma_2 - 2I_d\|_2 \|\hat{\Sigma}_2 - \Sigma_2\|_{\max} \right]\end{aligned}\tag{8}$$

54 Follow the classic asymptotic result in univariate OLS and use the union bound, we have

$$\|\hat{\Sigma}_1 - \Sigma_1\|_{\max} = O_p\left(\sqrt{\frac{\log d}{n}}\right) \quad \text{and} \quad \|\hat{\Sigma}_2 - \Sigma_2\|_{\max} = O_p\left(\sqrt{\frac{\log d}{n}}\right).\tag{9}$$

55 Then, we bound the first operator norm in (8) as

$$\begin{aligned}\|\hat{\Sigma}_1 + \Sigma_1 - 2I_d\|_2 &= \|\hat{\Sigma}_1 - \Sigma_1 + 2\Sigma_1 - 2I_d\|_2 \\ &\leq \|\hat{\Sigma}_1 - \Sigma_1\|_2 + 2\|\Sigma_1 - I_d\|_2 \\ &\leq d\|\hat{\Sigma}_1 - \Sigma_1\|_{\max} + 2\|\Sigma_1 - I_d\|_2 \\ &= O_p\left(\sqrt{\frac{d^2 \log d}{n}}\right) + O_p(\sqrt{d}),\end{aligned}\tag{10}$$

56 where the second term of the last equality is due to  $\|\Sigma_1\|_2 = O_p(\sqrt{d})$  derived from Assumption 2.  
57 Similarly, we have

$$\|\hat{\Sigma}_2 + \Sigma_2 - 2I_d\|_2 = O_p\left(\sqrt{\frac{d^2 \log d}{n}} + \sqrt{d}\right).\tag{11}$$

58 By plugging (9), (10) and (11) back to (7), we conclude the proof by showing

$$\|\hat{\xi}_1 - \xi_1\|_\infty = O_p\left(r^4 \sqrt{\frac{\log d}{n}} + r^4 \sqrt{d} \frac{\log d}{n}\right).$$

59 □

### 60 A.3 Proof of Theorem 3

We will work on the space of probability measures on  $X \subset \mathbb{R}^d$  with bounded  $p$ th moment, i.e.

$$\mathcal{P}_p(X) \equiv \left\{ \mu \in \mathcal{P}(X) : \int_X |x|^p d\mu(x) < \infty \right\}.$$

61 The following Lemma follows the Theorem 5.10 in [6], which provides the weak convergence in  
62 Wasserstein distance. Hence we omit its proof.

63 **Lemma 4.** *Let  $X \subset \mathbb{R}^d$  be compact, and  $\mu_n, \mu \in \mathcal{P}(X)$ . Then  $\mu_n \rightarrow \mu$  if and only if  $W_p(\mu_n, \mu) \rightarrow$   
64 0.*

65 Denote  $\widehat{W}_p^*(\mathbf{X}, \mathbf{Y}) = \left( \frac{1}{n} \sum_{i=1}^n \|\mathbf{x}_i - \phi^*(\mathbf{x}_i)\|^p \right)^{1/p}$ , the empirical Wasserstein distance with true

66 OTM  $\phi^*(\cdot)$ . The following Lemma follows the Theorem 2.1 in [3] guarantees that  $\widehat{W}_p^*(\mathbf{X}, \mathbf{Y})$  is a  
67 consistent estimator of  $W_2(p_x, p_y)$ . We refer to [3] for its proof.

68 **Lemma 5.** *Under Assumption 2 (a) and (b),  $\widehat{W}_p^*(\mathbf{X}, \mathbf{Y})$  converges almost surely to  $W_2(p_x, p_y)$  as  
69  $n \rightarrow \infty$ .*

70 **Proof of Theorem 3.** Notice that, we can decompose the empirical Wasserstein distance as

$$\begin{aligned} & \widehat{W}_p(\phi^{(K)}(\mathbf{X}), \mathbf{X}) \\ &= \left\{ \widehat{W}_p(\phi^{(K)}(\mathbf{X}), \mathbf{X}) - W_p(\phi^{(K)}(X), X) \right\} + \left\{ W_p(\phi^{(K)}(X), X) - W_p(\phi^*(X), X) \right\} + W_p(\phi^*(X), X) \\ &\equiv I_1 + I_2 + I_3. \end{aligned}$$

71 First, under Assumption 2 (a) and (b) and with Lemma 5, one can show that  $I_1$  converges to 0 almost  
72 surely as  $n \rightarrow \infty$ .

73 For any  $k \geq 0$ , denote  $\Delta^{[k]} = \mathbf{X}^{[k+1]} - \mathbf{X}^{[k]}$ . Then, we have

$$\begin{aligned} \Delta^{[k]} &= (\phi^{(k)}(\mathbf{X}^{[k]}\boldsymbol{\xi}_k) - \mathbf{X}^{[k]}\boldsymbol{\xi}_k)\boldsymbol{\xi}_k^\top \\ &= (\mathbf{Y}\boldsymbol{\xi}_k - \mathbf{X}^{[k]}\boldsymbol{\xi}_k)\boldsymbol{\xi}_k^\top \\ &= (\mathbf{Y} - \mathbf{X}^{[k]})\boldsymbol{\xi}_k\boldsymbol{\xi}_k^\top, \end{aligned} \tag{12}$$

74 where the second inequality used the fact that  $\phi^{(k)}(\cdot)$  is the OTM between  $\mathbf{X}^{[k]}\boldsymbol{\xi}_k$  and  $\mathbf{Y}\boldsymbol{\xi}_k$ .

75 Therefore, by taking the vector norm to both sides or (12), we have

$$\begin{aligned} \|\Delta^{[k]}\|_2 &= \|(\mathbf{Y} - \mathbf{X}^{[k]})\boldsymbol{\xi}_k\boldsymbol{\xi}_k^\top\|_2 \\ &= \text{Tr}\{\boldsymbol{\xi}_k^\top(\mathbf{Y} - \mathbf{X}^{[k]})\boldsymbol{\xi}_k\} \\ &= \lambda_k^2 \|\mathbf{Y} - \mathbf{X}^{[k]}\|_2 \\ &= \lambda_k^2 \|(\mathbf{Y} - \mathbf{X}^{[k+1]}) + \Delta^{[k+1]}\|_2 \\ &\geq \lambda_k^2 \left\{ \|\mathbf{Y} - \mathbf{X}^{[k+1]}\|_2 - \|\Delta^{[k+1]}\|_2 \right\} \\ &\geq \lambda_k^2 \left\{ \lambda_{k+1}^{-2} \|\Delta^{[k+1]}\|_2 \right\} = \frac{\lambda_k^2}{\lambda_{k+1}^2} \|\Delta^{[k+1]}\|_2. \end{aligned}$$

In other words, we have

$$\|\Delta^{[k+1]}\|_2 \leq \frac{\lambda_{k+1}^2}{\lambda_k^2} \|\Delta^{[k]}\|_2 \leq \frac{\lambda_{k+1}^2}{\lambda_0^2} \|\Delta^{[0]}\|_2, \quad \text{for } k \geq 0.$$

76 According to Theorem 2,  $\lambda_k$  is a consistent estimator of the leading eigenvalue of  $\Sigma_{\text{SAVE}}$  in the  $k$ th  
77 iteration. Also, according to Theorem 1,  $\lambda_k$  is upper bounded by the  $k$ th eigenvalue of  $\Sigma$ , almost  
78 surely. Then, under Assumption 2 (c), we have  $\lambda_k/\lambda_1$  converges to 0 as  $d \rightarrow \infty$  and  $k \geq Cd$  for  
79 some  $C > 0$ . This implies  $\|\Delta^{[k+1]}\|_2 \rightarrow 0$  as  $d \rightarrow \infty$  and  $k \geq Cd$ .

80 Then, Lemma 4 guarantees that  $I_2$  weakly converges to 0 as  $d \rightarrow \infty$  and  $k \geq Cd$  and hence completes  
81 our proof.

82

□

83 **References**

- 84 [1] R. D. Cook. *Regression graphics: Ideas for studying regressions through graphics*, volume 482.  
85 John Wiley & Sons, 2009.
- 86 [2] J. Fan, W. Wang, and Y. Zhong. An  $l_\infty$  eigenvector perturbation bound and its application to  
87 robust covariance estimation. *Journal of Machine Learning Research*, 18(207):1–42, 2018.
- 88 [3] T. Klein, J.-C. Fort, and P. Berthet. Convergence of an estimator of the wasserstein distance  
89 between two continuous probability distributions. 2017.
- 90 [4] B. Li and S. Wang. On directional regression for dimension reduction. *Journal of the American*  
91 *Statistical Association*, 102(479):997–1008, 2007.
- 92 [5] B. Li, H. Zha, F. Chiaromonte, et al. Contour regression: a general approach to dimension  
93 reduction. *The Annals of Statistics*, 33(4):1580–1616, 2005.
- 94 [6] F. Santambrogio. Optimal transport for applied mathematicians. *Birkäuser, NY*, 55:58–63, 2015.
